# Supplementary material for: Polyethylene oxide enhances the ductility and toughness of polylactic acid: the role of mesophase
Source: Royal Society of Chemistry journal article supplement (doi:10.1039/d0sm00671h), 2020-01-01
Supplement: d0sm00671h1.pdf [file d0sm00671h1.pdf]

## Electronic supplementary information (ESI)

### Polyethylene Oxide Enhanced Ductility and Toughness of Polylactic Acid: the Role of Mesophase

Zhen Wang<sup>a,\*</sup>, Chuang Zhang<sup>a</sup>, Zhen Zhang<sup>a</sup>, Xin Chen<sup>a</sup>, Xiaohui Wang<sup>a</sup>, Mingjie Wen<sup>a</sup>, Bin Chen<sup>a</sup>, Wei Cao<sup>a</sup>, Chuntai Liu<sup>a</sup>

<sup>a</sup>National Engineering Research Center for Advanced Polymer Processing Technology; Key Laboratory of Materials Processing and Mold (Zhengzhou University), Ministry of Education, Zhengzhou University, Zhengzhou, 450002, China

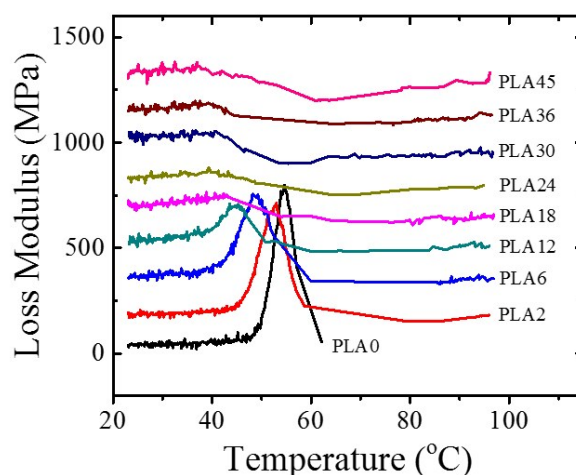

**Fig. S1** Temperature dependence of loss modulus of WQ-films ( $30 \times 5 \times 0.2 \text{ mm}^3$ , length  $\times$  width  $\times$  thickness) measured by DMA. The curves are intentionally shifted along the loss modulus axis for the sake of clarity. Experiments were carried out on a Q800 apparatus from TA Instrument (USA) in the multifrequency strain mode with a frequency of 1 Hz. The temperature covers a range of 20–100 °C at a heating rate of 3 °C/min. The peak of loss modulus is interpreted as  $T_{g-PLA}$ , which presents a decrease from around 56 °C for PLA0 to 39 °C for PLA45 with increasing PEO content. The DMA measurement gives a consistent result with that of DSC.

\*Corresponding author: [wangz@zzu.edu.cn](mailto:wangz@zzu.edu.cn)

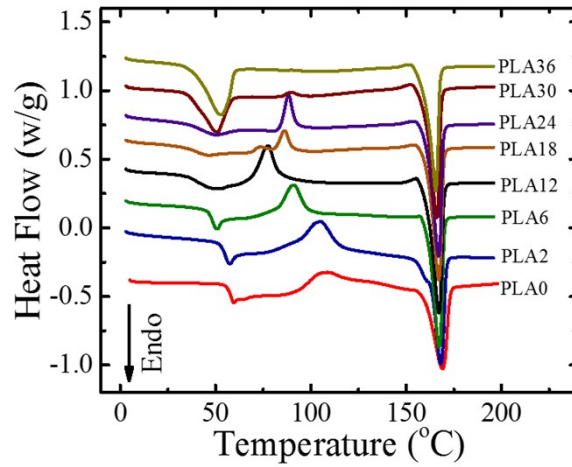

**Fig. S2** DSC curves of SC-films in the heating process from 0 to 200 °C at a rate of 10 °C/min. The curves are intentionally shifted along the heat flow axis for the sake of clarity. The  $T_{g-PLA}$  of SC-films presents a similar evolution trend to that of WQ-films.

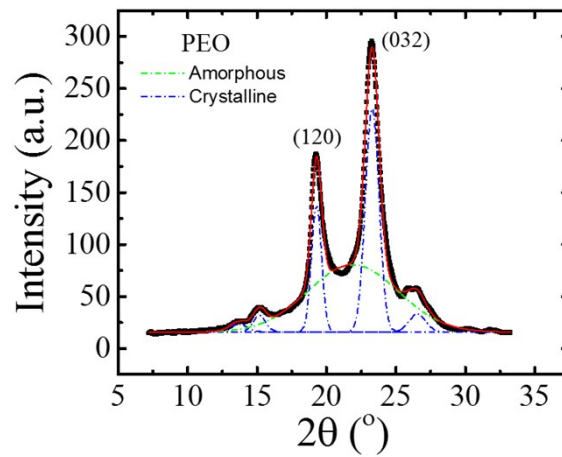

**Fig. S3** Typical 1D WAXD intensity curve of pure PEO that is crystallized. The diffraction peak of amorphous phase is located at  $2\theta$  of 21.7°, close to that of 21.5° of amorphous PLA.

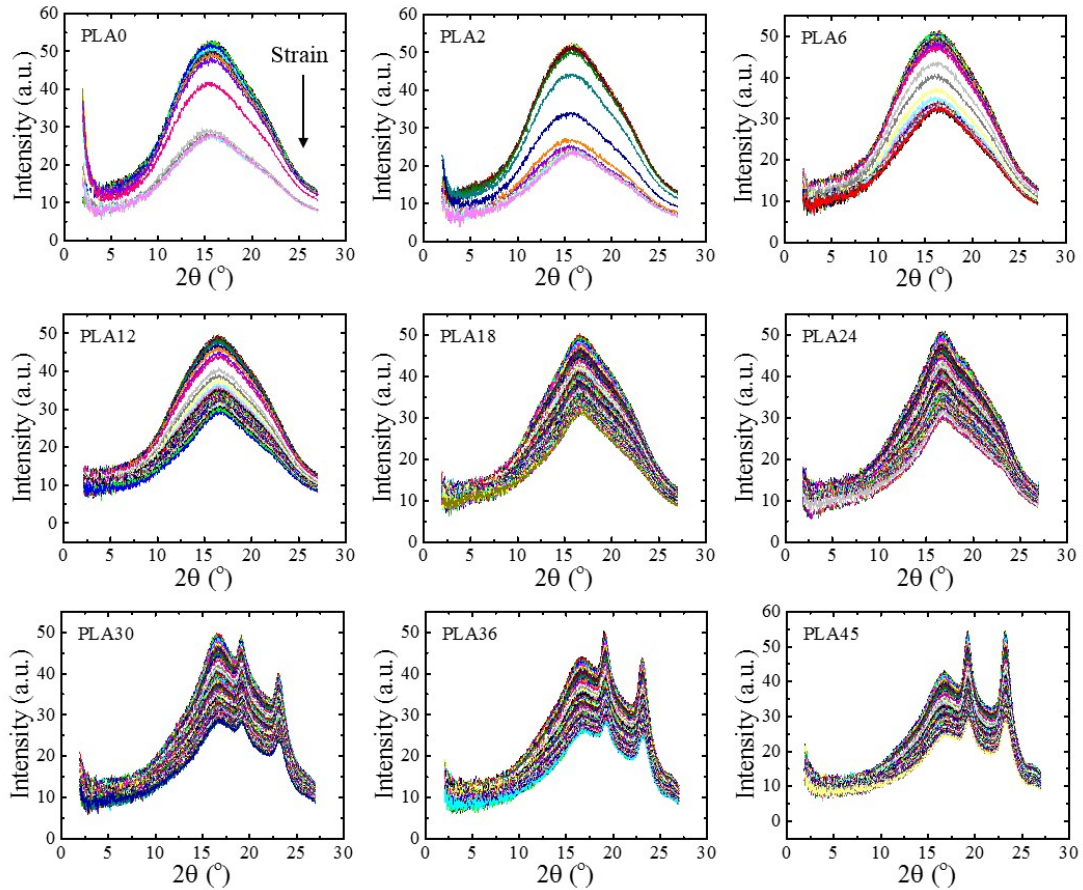

**Fig. S4** 1D WAXD intensity curves of WQ-films under tensile deformation. The arrow denotes the direction of strain increase.

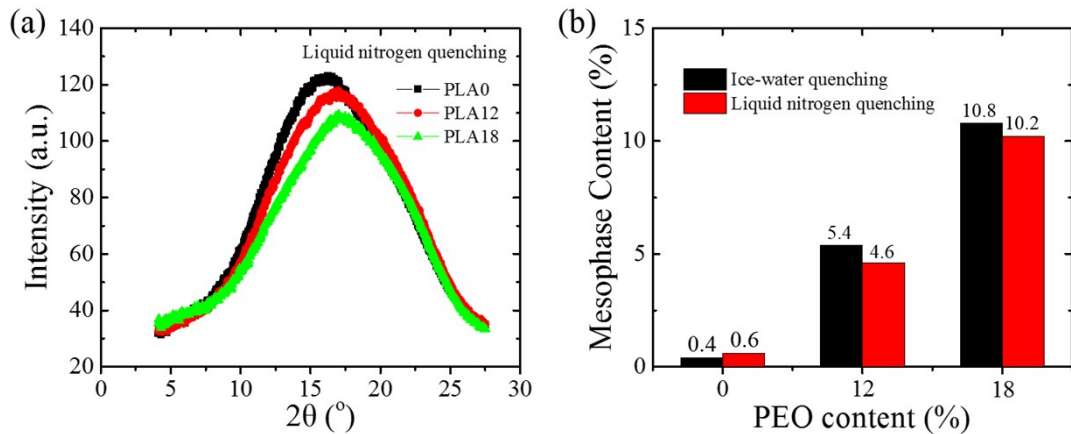

**Fig. S5** (a) 1D WAXD intensity curves of PLA0, 12 and 18 films prepared by liquid nitrogen quenching from 200 to  $-196^\circ\text{C}$ . (b) Comparison of the mesophase content in PLA/PEO composite films prepared by liquid nitrogen quenching with that by ice-water quenching. It can be found that only a very limited decrease of mesophase content occurs if ice-water is replaced by liquid nitrogen. This means that the melt quenching induced formation of PLA mesophase exists in a large cooling

rate window.

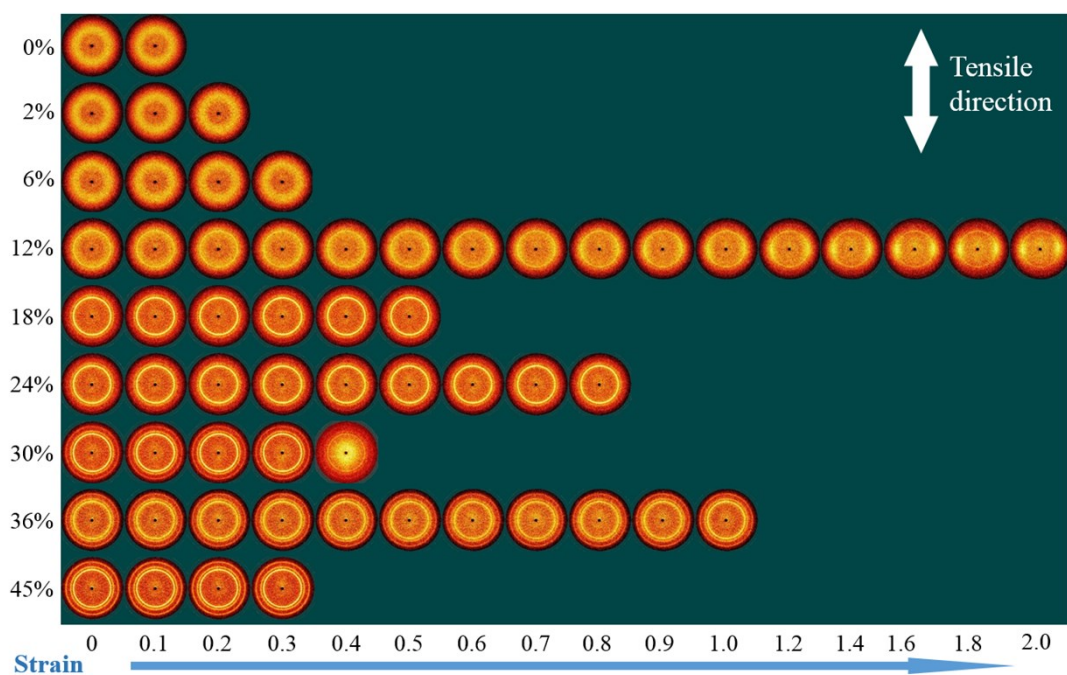

**Fig. S6** Selected 2D WAXD patterns of SC-films as a function of strain under deformation. The deformational direction is vertical.

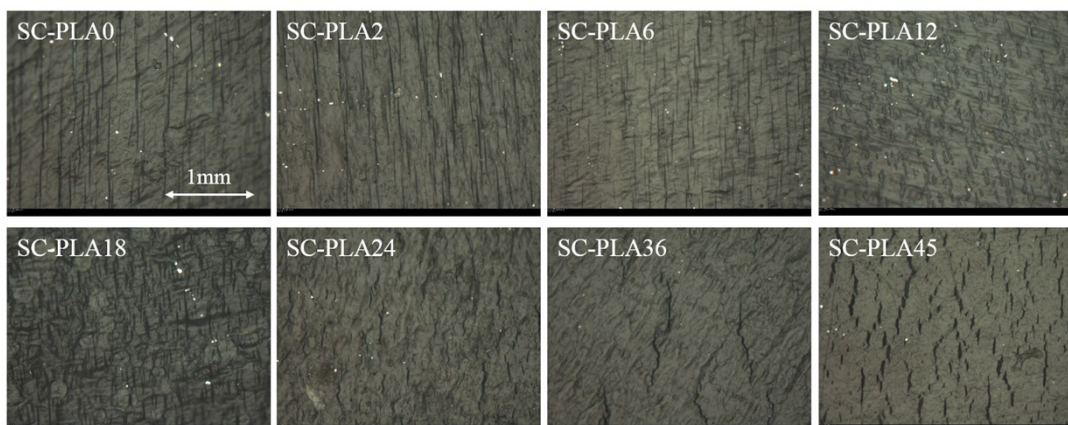

**Fig. S7** POM micrographs of the surface topography close to the fracture edge of SC-films after tensile deformation.
